# Supplementary material for: AMPK activation by ASP4132 inhibits non-small cell lung cancer cell growth
Source: PubMed Central journal article supplement (PMC8024326; doi:10.1038/s41419-021-03655-2), 2021-04-06
Supplement: 41419_2021_3655_MOESM1_ESM.pdf [file 41419_2021_3655_MOESM1_ESM.pdf]

## Figure S1

### A. pNSCLC-1

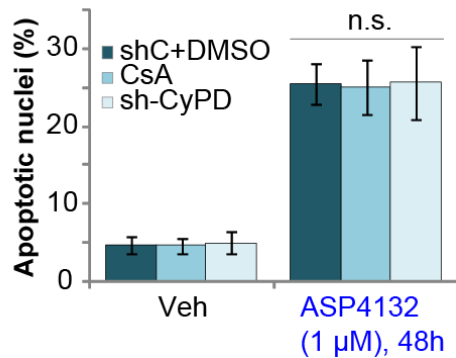

### B.

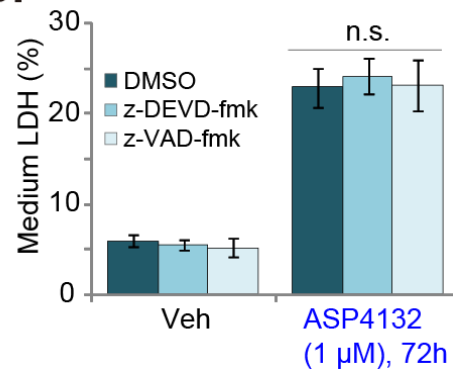

**Figure S1.** Stable pNSCLC-1 cells with CyPD shRNA lentiviral particles (sh-CyPD) or control cells with cyclosporin A pretreatment (CsA, 5  $\mu$  M, 1h pretreatment), as well as cells with vehicle control treatment plus scramble control shRNA lentiviral particles (“shC+DMSO”), were treated with ASP4132 (1  $\mu$ M) and cultured for 48h, cell apoptosis was tested by apoptotic nuclei staining assay (results were quantified, **A**). pNSCLC-1 cells were pretreated with the caspase-3 inhibitor z-DEVD-fmk (50  $\mu$ M, 1h pretreatment) or the pan caspase inhibitor z-VAD-fmk (50  $\mu$ M, 1h pretreatment), followed by ASP4132 (1  $\mu$ M) treatment and cultured for 72h, cell necrosis was quantified by medium LDH release assay (**B**). Data were presented as mean  $\pm$  standard deviation (SD, n=5). “n.s.” stands for no statistical difference. The experiments were repeated five times with similar results detected.
